# Supplementary material
Source: PubMed Central journal article supplement (PMC11215755)
Supplement: NIHMS2000887-supplement-Supplementary_Info.pdf [file NIHMS2000887-supplement-Supplementary_Info.pdf]

---

**Supplementary information**

---

**At a crossroads: how to translate the roles of PI3K in oncogenic and metabolic signalling into improvements in cancer therapy**

---

In the format provided by the authors and unedited

**Supplementary Table 1 | Examples of trials testing PI3K-pathway inhibitors in new combinations and/or new cancer settings**

| Therapeutic strategy and interventions tested                                                                                        | Patient population                                                                                                          | Study phase | ClinicalTrials.gov identifier (trial name) |
|--------------------------------------------------------------------------------------------------------------------------------------|-----------------------------------------------------------------------------------------------------------------------------|-------------|--------------------------------------------|
| <b>PI3K inhibition plus metabolic modulation</b>                                                                                     |                                                                                                                             |             |                                            |
| Alpelisib (PI3K $\alpha$ inhibitor) and fulvestrant + a ketogenic diet vs a low-carbohydrate diet vs canagliflozin (SGLT2 inhibitor) | Metastatic <i>PIK3CA</i> -mutant ER <sup>+</sup> HER2 <sup>-</sup> breast cancer                                            | II          | NCT05090358 (TIFA)                         |
| <b>PI3K inhibition for tumours with multiple <i>PIK3CA</i> mutations</b>                                                             |                                                                                                                             |             |                                            |
| Inavolisib                                                                                                                           | Advanced-stage cancers with multiple co-existing <i>PIK3CA</i> mutations                                                    | II          | NCT04589845 (TAPISTRY cohort H)            |
| <b>PI3K-pathway inhibition plus hormone therapy</b>                                                                                  |                                                                                                                             |             |                                            |
| Alpelisib + enzalutamide (ar inhibitor)                                                                                              | AR <sup>+</sup> PTEN <sup>+</sup> metastatic breast cancer                                                                  | Ib          | NCT03207529                                |
| Abiraterone (anti-androgen) and androgen-deprivation therapy + capivasertib (AKT inhibitor) or placebo                               | Metastatic <i>PTEN</i> -deficient castration-sensitive prostate cancer                                                      | III         | NCT04493853 (CAPItello-281)                |
| Fulvestrant (SERD) + capivasertib or placebo                                                                                         | Previously treated advanced-stage ER <sup>+</sup> HER2 <sup>-</sup> breast cancer                                           | III         | NCT04305496 (CAPItello-291)                |
| <b>PI3K-pathway and CDK4/6 inhibition</b>                                                                                            |                                                                                                                             |             |                                            |
| Alpelisib + ribociclib (CDK4/6 inhibitor) + letrozole (AI)                                                                           | Advanced-stage ER <sup>+</sup> HER2 <sup>-</sup> breast cancer                                                              | Ib/II       | NCT01872260                                |
| Palbociclib (CDK4/6 inhibitor) and fulvestrant + capivasertib or placebo                                                             | Advanced-stage ER <sup>+</sup> HER2 <sup>-</sup> breast cancer (endocrine-resistant disease only in phase III part)         | Ib/III      | NCT04862663 (CAPItello-292)                |
| Palbociclib and fulvestrant + ipatasertib (AKT inhibitory) or placebo                                                                | Metastatic ER <sup>+</sup> HER2 <sup>-</sup> breast cancer without ctDNA suppression after 15 days of CDK4/6i + fulvestrant | II          | NCT04920708 (FAIM)                         |
| Gedatolisib (dual PI3K/mTOR inhibitor) + palbociclib                                                                                 | Various advanced-stage solid tumours                                                                                        | I           | NCT03065062                                |
| <b>PI3K inhibition plus anti-HER2 therapy</b>                                                                                        |                                                                                                                             |             |                                            |
| Alpelisib + trastuzumab (anti-HER2 antibody) $\pm$ fulvestrant vs trastuzumab + chemotherapy                                         | Previously treated advanced-stage <i>PIK3CA</i> -mutant HER2 <sup>+</sup> breast cancer                                     | III         | NCT05063786 (ALPHABET)                     |
| Trastuzumab and pertuzumab (anti-HER2 antibody) + alpelisib or placebo                                                               | Advanced-stage <i>PIK3CA</i> -mutant HER2 <sup>+</sup> breast cancer, as maintenance therapy                                | III         | NCT04208178 (EPIK-B2)                      |
| <b>PI3K and PARP inhibition</b>                                                                                                      |                                                                                                                             |             |                                            |
| Alpelisib and olaparib vs chemotherapy                                                                                               | Platinum-resistant/refractory ovarian cancer without germline <i>BRCA</i> mutations                                         | III         | NCT04729387 (EPIK-O)                       |
| <b>PI3K-pathway inhibition plus chemotherapy</b>                                                                                     |                                                                                                                             |             |                                            |
| Nab-paclitaxel + alpelisib or placebo                                                                                                | Advanced-stage <i>PIK3CA</i> -mutant and/or <i>PTEN</i> -deficient triple-negative breast cancer                            | III         | NCT04251533 (EPIK-B3)                      |
| Paclitaxel + capivasertib or placebo                                                                                                 | Previously untreated advanced-stage triple-negative breast cancer                                                           | III         | NCT03997123 (CAPItello-290)                |

AI, aromatase inhibitor; AR, androgen receptor; ER, oestrogen receptor; SERD, selective oestrogen receptor degrader; SGLT2, sodium–glucose co-transporter 2.
